# Supplementary material
Source: PubMed Central journal article supplement (PMC6844566)
Supplement: krnb-16-12-1664885-s001.pdf [file krnb-16-12-1664885-s001.pdf]

## **Supplementary Information**

### **Exploration of CCA-added RNAs revealed the expression of mitochondrial non-coding RNAs regulated by CCA-adding enzyme**

#### **Supplementary figure legends**

**Figure S1. Sequences and secondary structures of identified CCA-RNAs (A) and NCCA-RNAs (B).**

**Figure S2. A possible mechanism for the non-template addition of 3'-terminal nucleotides of nccaR-1**

**Figure S3. Probes for northern blots of CCA-RNAs**

**Figure S4. Quantification of northern blots**

Northern blots from TRNT1 knockdown experiments (A, from Fig. 5B) and cellular treatments (B, from Fig. 6) were quantified and relative intensities are presented.

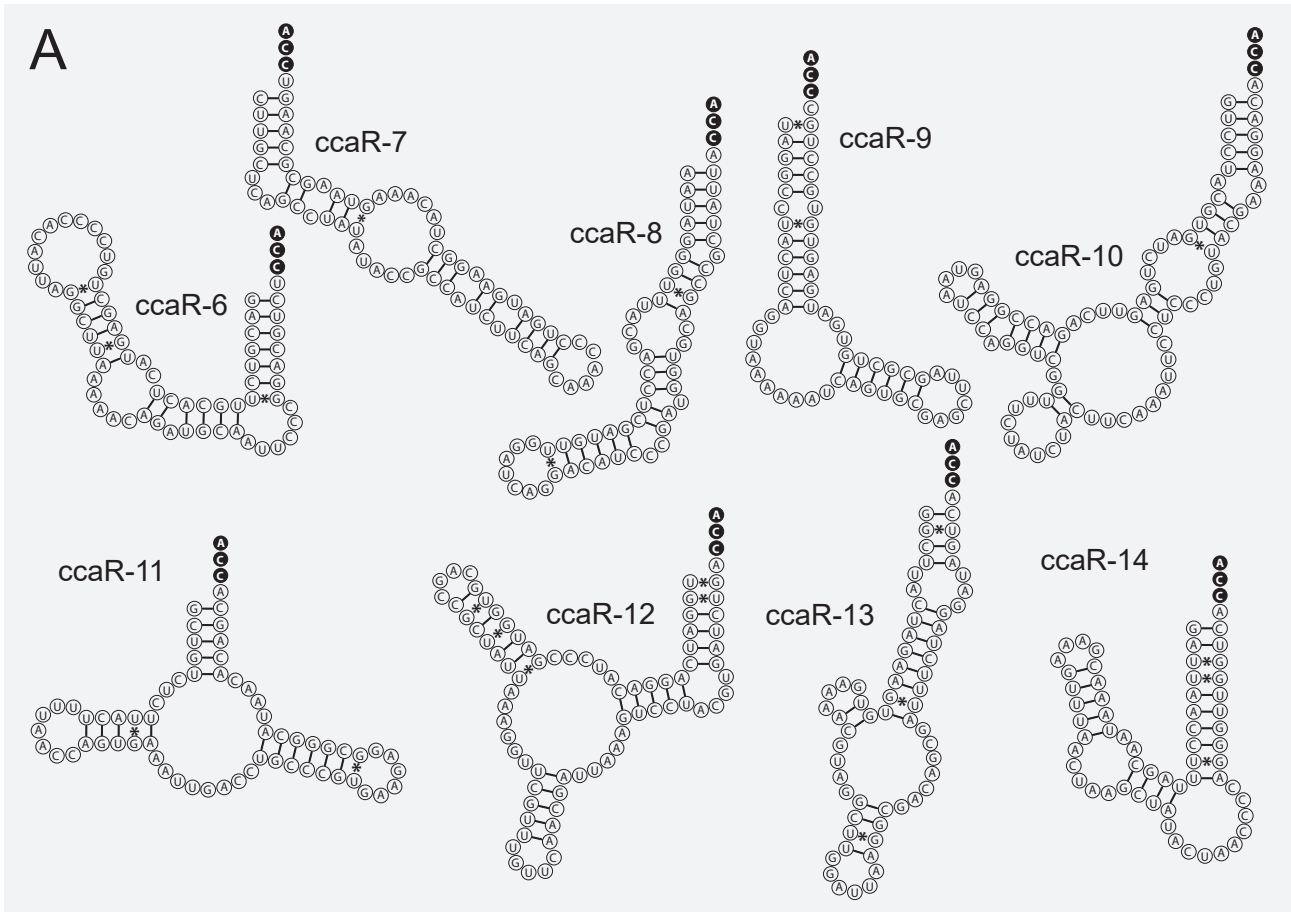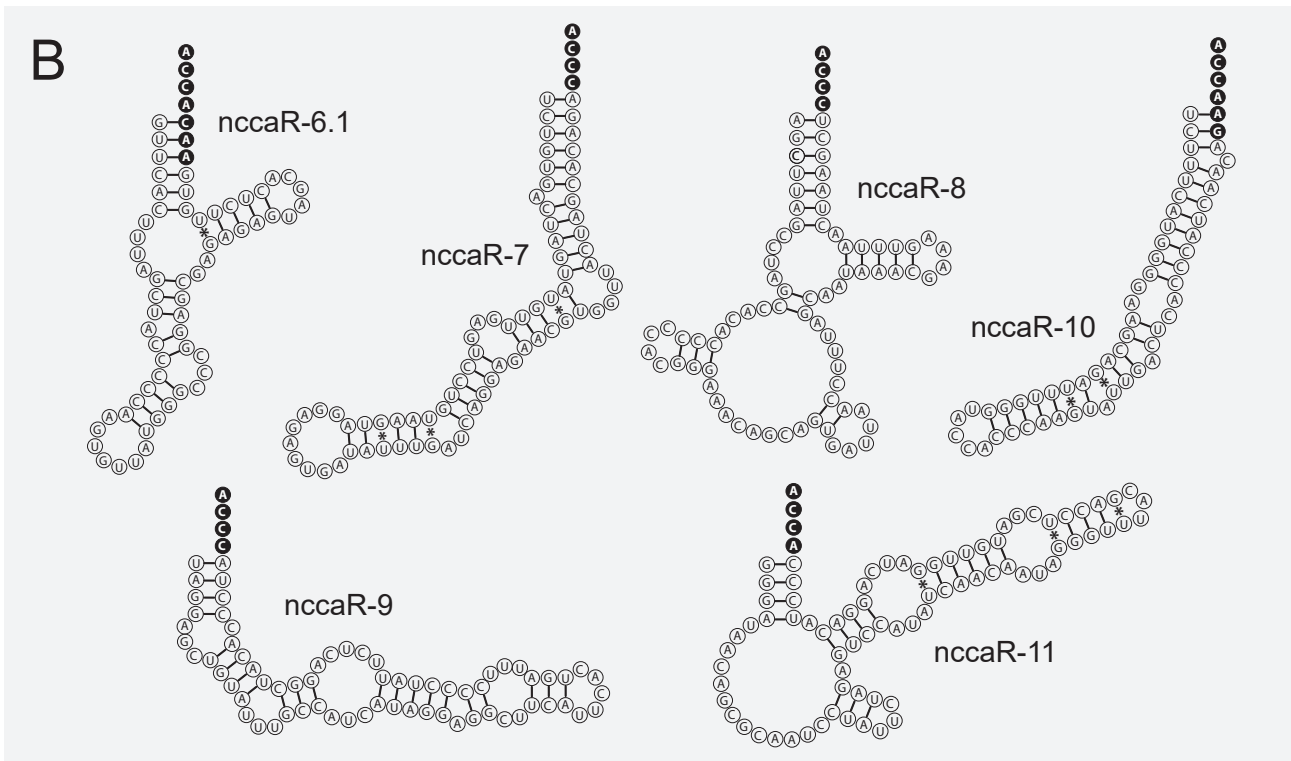

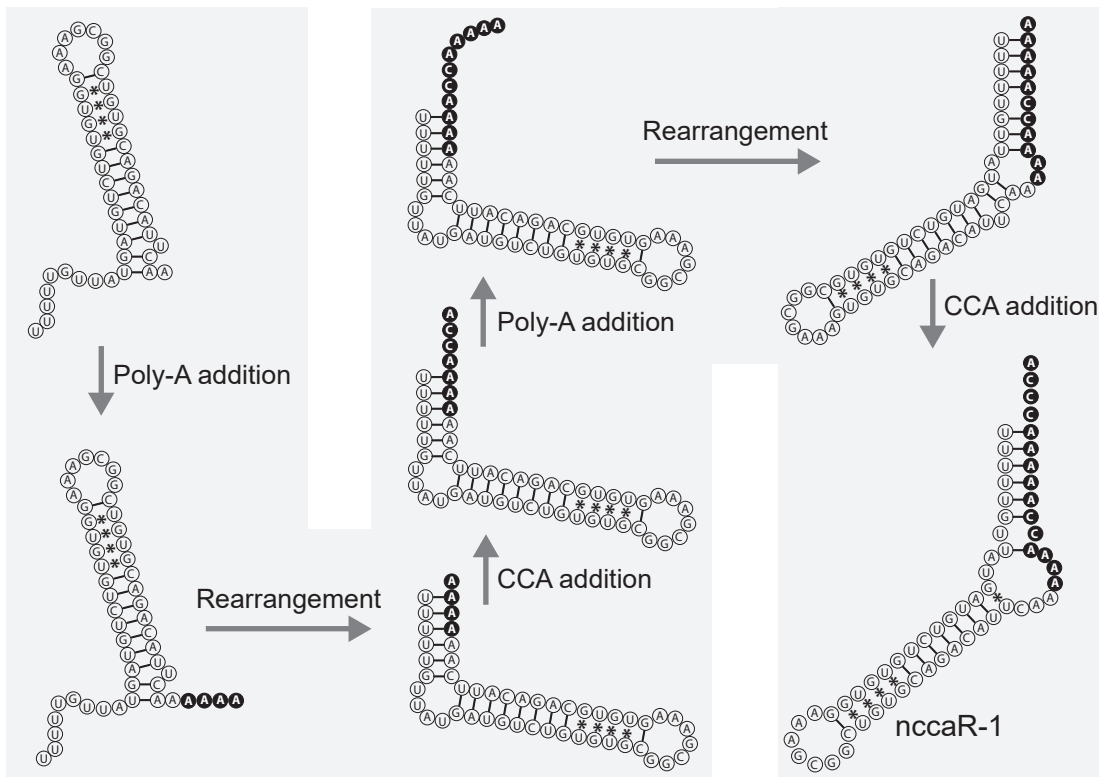

*Pawar et al. Figure S2*

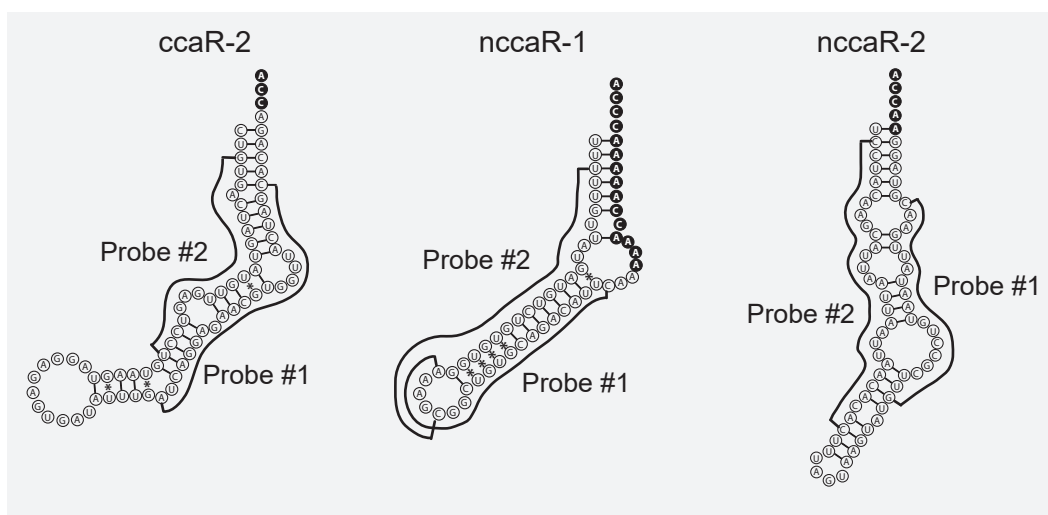

*Pawar et al. Figure S3*

**A**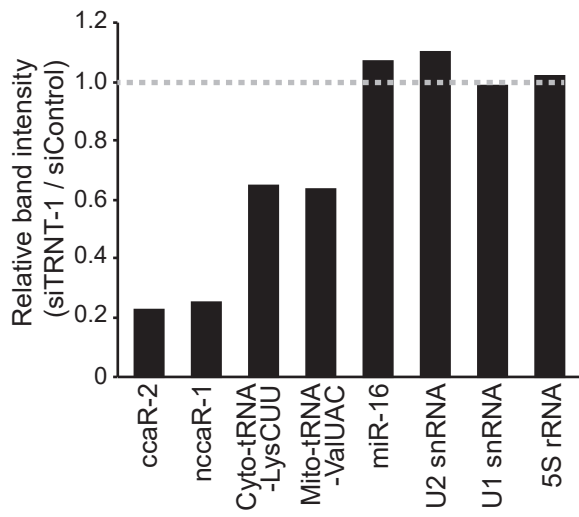**B**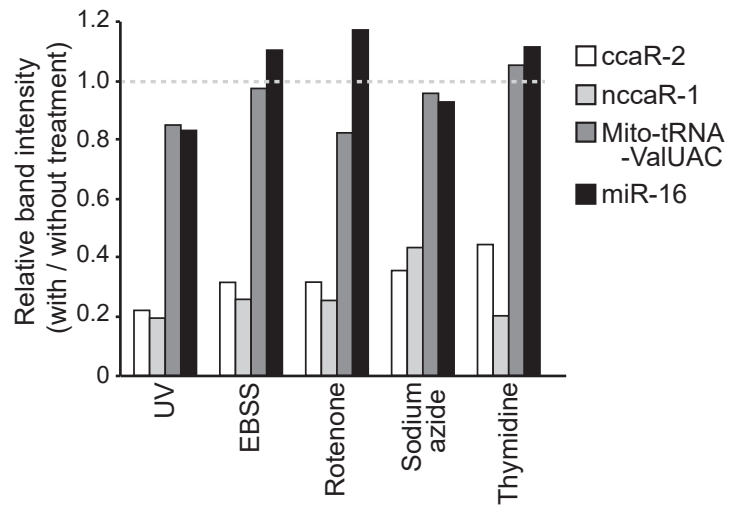

**Table S1. Identified sequences of CCA-RNAs and NCCA-RNAs**

| Name             | Variant | %     | Sequence ( <i>red characters are not encoded on the genome</i> )                              | Length (nt) | Genome |
|------------------|---------|-------|-----------------------------------------------------------------------------------------------|-------------|--------|
| <b>CCA-RNAs</b>  |         |       |                                                                                               |             |        |
| masoRNA          |         | 88.69 | GATGCTGGTGGTTGGCACTCCTGGTTTCCAGGACGGGGTTTCAGATCCCTGCGGCGTCTCCA                                | 81          | Nuc    |
| ccaR-1           |         | 9.45  | CCTGATGAAGGCTACAAAGTAAGCGCAAGTACCCACGTAAAGACGTTAGGTCAAGGTGTAGCCCATGAGGTCCA                    | 74          | Mito   |
| ccaR-2           |         | 5.95  | CTGTGACTAGTATGTTGAGTCCCTGTAAGTAGGAGAGTGTATTTTGTACAGGAGAAGCTGGTTACTAGCACAGACCA                 | 76          | Mito   |
| ccaR-3           |         | 3.16  | GGGATAACAGCGCAATCCTATTCTAGAGTCCATATCAACAATAGGGTTTACGACCTCGATGTTGGATCAGGACATCCCGCCA            | 82          | Mito   |
| ccaR-4           |         | 1.75  | GCTTAGCCTAGCCACACCCCCACGGGAAACAGCAGTGATTAACCTTTAGCAATAAACGAAAGTTTAACTAAGCTCCA                 | 77          | Mito   |
| ccaR-5           |         | 1.36  | AGTGACACATGTTTAAACGGCCGGGTACCCCTAACCGTGCAAAGGTAGCATAATCACTTCCA                                | 61          | Mito   |
| ccaR-6           |         | 1.29  | GACGTCTTGCACCTATGAGCTGTCCCCACATTAAGGCTTAAAAACAGATGCAATTCCCGGACGTCTCCA                         | 68          | Mito   |
| ccaR-7           |         | 0.76  | CTTGCTCAGCCTATATACCGCCATCTTCAGCAAACCCCTGATGAAGGCTACAAAGTAAGCGCAAGTCCA                         | 68          | Mito   |
| ccaR-8           |         | 0.46  | AATAGGGTTTACGACCTCGATGTTGGATCAGGACATCCCGATGGTGCAGCCGCTATTCCA                                  | 61          | Mito   |
| ccaR-9           |         | 0.34  | TAGGCCTACTCAGGTAATAAATCAGTGCAGGCTTAGCGCTGTGATGAGTGTGCCTGCCA                                   | 60          | Mito   |
| ccaR-10          |         | 0.25  | GTCTACGTGATCTGAGTTCAGACCCGAGTAATCCAGTCCGGTTTCTATCTACTTCAAATTCCTCCCTGTACGAAAGGACCCA            | 84          | Mito   |
| ccaR-11          |         | 0.19  | GCTGTCTCTTACTTTTAAACCAGTGAATTTGACCTGCCCGTGAAGAGGCGGGCATAACACAGCACA                            | 66          | Mito   |
| ccaR-12          |         | 0.08  | TGGATCAGGACATCCCGATGGTGCAGCCGCTATTAAGGTTTGGTTTGTCAACGATTAAGTCCCTACGTGATCTGACA                 | 79          | Mito   |
| ccaR-13          |         | 0.07  | GGCTTACTAGAAGTGTGAAACCTGAGGCTTGGATTAAGGCGACAGCGATTTCTAGGATAGTCAACA                            | 66          | Mito   |
| ccaR-14          |         | 0.03  | GATTAACCTTTAGCAATAAACGAAAGTTTAACTAAGCTACTAACCACAGGTTTGGTCAACA                                 | 63          | Mito   |
| <b>NCCA-RNAs</b> |         |       |                                                                                               |             |        |
| nocaR-1          | 1       | 0.73  | TTTTTGTTATGATGTCTGTGTGAAAGCGGCTGTGCAGACATTCAA <del>AAAAACAAAAACCCA</del>                      | 81          | Mito   |
|                  | 2       | 0.19  | TTTTTGTTATGATGTCTGTGTGAAAGCGGCTGTGCAGACATTCAA <del>AAAAACAAAAACCCA</del>                      | 64          | Mito   |
|                  | 3       | 0.19  | TTTTTGTTATGATGTCTGTGTGAAAGCGGCTGTGCAGACATTCAA <del>AAAAACAAAAACCCA</del>                      | 60          | Mito   |
|                  | 4       | 0.12  | TTTTTGTTATGATGTCTGTGTGAAAGCGGCTGTGCAGACATTCAA <del>AAAAACAAAAACCCA</del>                      | 61          | Mito   |
|                  | 5       | 0.08  | TTTTTGTTATGATGTCTGTGTGAAAGCGGCTGTGCAGACATTCAAT <del>AAAAACAAAAACCCA</del>                     | 64          | Mito   |
|                  | 6       | 0.08  | TTTTTGTTATGATGTCTGTGTGAAAGCGGCTGTGCAGACATTCAA <del>AAAAACAAAAACCCA</del>                      | 62          | Mito   |
|                  | 7       | 0.08  | TTTTTGTTATGATGTCTGTGTGAAAGCGGCTGTGCAGACATTCAA <del>AAAAACAAAAACCCA</del>                      | 62          | Mito   |
|                  | 8       | 0.08  | TTTTTGTTATGATGTCTGTGTGAAAGCGGCTGTGCAGACATTCAA <del>AAAAACAAAAACCCA</del>                      | 61          | Mito   |
|                  | 9       | 0.08  | TTTTTGTTATGATGTCTGTGTGAAAGCGGCTGTGCAGACATTCAAT <del>AAAAACAAAAACCCA</del>                     | 60          | Mito   |
|                  | 10      | 0.07  | TTTTTGTTATGATGTCTGTGTGAAAGCGGCTGTGCAGACATTCAA <del>AAAAACAAAAACCCA</del>                      | 61          | Mito   |
|                  | 11      | 0.05  | TTTTTGTTATGATGTCTGTGTGAAAGCGGCTGTGCAGACATTCAAT <del>AAAAACAAAAACCCA</del>                     | 61          | Mito   |
|                  | 12      | 0.05  | TTTTTGTTATGATGTCTGTGTGAAAGCGGCTGTGCAGACATTCAA <del>AAAAACAAAAACCCA</del>                      | 60          | Mito   |
|                  | 13      | 0.05  | TTTTTGTTATGATGTCTGTGTGAAAGCGGCTGTGCAGACATTCAA <del>AAAAACAAAAACCCA</del>                      | 60          | Mito   |
|                  | 14      | 0.05  | TTTTTGTTATGATGTCTGTGTGAAAGCGGCTGTGCAGACATTCAAT <del>AAAAACAAAAACCCA</del>                     | 60          | Mito   |
|                  | 15      | 0.03  | TTTTTGTTATGATGTCTGTGTGAAAGCGGCTGTGCAGACATTCAA <del>AAAAACAAAAACCCA</del>                      | 65          | Mito   |
|                  | 16      | 0.03  | TTTTTGTTATGATGTCTGTGTGAAAGCGGCTGTGCAGACATTCAAT <del>AAAAACAAAAACCCA</del>                     | 64          | Mito   |
|                  | 17      | 0.03  | TTTTTGTTATGATGTCTGTGTGAAAGCGGCTGTGCAGACATTCAA <del>AAAAACAAAAACCCA</del>                      | 63          | Mito   |
|                  | 18      | 0.03  | TTTTTGTTATGATGTCTGTGTGAAAGCGGCTGTGCAGACATTCAA <del>AAAAACAAAAACCCA</del>                      | 63          | Mito   |
|                  | 19      | 0.03  | TTTTTGTTATGATGTCTGTGTGAAAGCGGCTGTGCAGACATTCAAT <del>AAAAACAAAAACCCA</del>                     | 62          | Mito   |
|                  | 20      | 0.03  | TTTTTGTTATGATGTCTGTGTGAAAGCGGCTGTGCAGACATTCAAT <del>AAAAACAAAAACCCA</del>                     | 62          | Mito   |
|                  | 21      | 0.03  | TTTTTGTTATGATGTCTGTGTGAAAGCGGCTGTGCAGACATTCAAT <del>AAAAACAAAAACCCA</del>                     | 60          | Mito   |
|                  | 22      | 0.03  | TTTTTGTTATGATGTCTGTGTGAAAGCGGCTGTGCAGACATTCAA <del>AAAAACAAAAACCCA</del>                      | 60          | Mito   |
|                  | 23      | 0.03  | TTTTTGTTATGATGTCTGTGTGAAAGCGGCTGTGCAGACATTCAAT <del>AAAAACAAAAACCCA</del>                     | 60          | Mito   |
| nocaR-2          | 1       | 1.16  | TCCTACAAGCATTAAATTAATTAACACACTTTAGTAAGTATGTTGCGCTGTAATATTGAACGTAGGA <del>ACCCA</del>          | 70          | Mito   |
|                  | 2       | 0.58  | TCCTACAAGCATTAAATTAATTAACACACTTTAGTAAGTATGTTGCGCTGTAATATTGAACGTAGGA <del>ACCCA</del>          | 72          | Mito   |
|                  | 3       | 0.19  | TCCTACAAGCATTAAATTAATTAACACACTTTAGTAAGTATGTTGCGCTGTAATATTGAACGTAGGA <del>ACCCA</del>          | 70          | Mito   |
|                  | 4       | 0.03  | TCCTACAAGCATTAAATTAATTAACACACTTTAGTAAGTATGTTGCGCTGTAATATTGAACGTAGGA <del>ACCCA</del>          | 71          | Mito   |
|                  | 5       | 0.03  | TCCTACAAGCATTAAATTAATTAACACACTTTAGTAAGTATGTTGCGCTGTAATATTGAACGTAGGA <del>ACCCA</del>          | 70          | Mito   |
| nocaR-3          | 1       | 0.41  | ACCTGATGAAGGCTACAAAGTAAGCGCAAGTACCCACGTAAGACGTTAGGTCAAGGTGTAGCCCATGAGGT <del>CCCA</del>       | 76          | Mito   |
|                  | 2       | 0.07  | GCCTGATGAAGGCTACAAAGTAAGCGCAAGTACCCACGTAAGACGTTAGGTCAAGGTGTAGCCCATGAGGT <del>CCCA</del>       | 76          | Mito   |
|                  | 3       | 0.03  | CCCTGATGAAGGCTACAAAGTAAGCGCAAGTACCCACGTAAGACGTTAGGTCAAGGTGTAGCCCATGAGGT <del>ACCA</del>       | 76          | Mito   |
| nocaR-4          | 1       | 0.27  | GGTTTACGACCTCGATGTTGGATCAGGACATCCCGATGGTGCAGCCGCTATTAAGGTTTCGTTTGT <del>AAAAACCCA</del>       | 76          | Mito   |
|                  | 2       | 0.12  | GTTTACGACCTCGATGTTGGATCAGGACATCCCGATGGTGCAGCCGCTATTAAGGTTTCGTTTGT <del>AAAAACCCA</del>        | 73          | Mito   |
|                  | 3       | 0.12  | TTTACGACCTCGATGTTGGATCAGGACATCCCGATGGTGCAGCCGCTATTAAGGTTTCGTTTGT <del>AAAAACCCA</del>         | 71          | Mito   |
| nocaR-5          | 1       | 0.14  | GTTTGGGCTACTGCTCGCAGTGCGCCGATCAGGGCGTAGTTTGAGTTTGATGCTCACCCGTATCA <del>AAAAACACCA</del>       | 77          | Mito   |
|                  | 2       | 0.05  | GTTTGGGCTACTGCTCGCAGTGCGCCGATCAGGGCGTAGTTTGAGTTTGATGCTCACCCGTATCA <del>AAAAACACCA</del>       | 76          | Mito   |
|                  | 3       | 0.05  | GTTTGGGCTACTGCTCGCAGTGCGCCGATCAGGGCGTAGTTTGAGTTTGATGCTCACCCGTATCA <del>AAAAACACCA</del>       | 75          | Mito   |
|                  | 4       | 0.03  | GTTTGGGCTACTGCTCGCAGTGCGCCGATCAGGGCGTAGTTTGAGTTTGATGCTCACCCGTATCA <del>AAAAACACCA</del>       | 73          | Mito   |
|                  | 5       | 0.03  | GTTTGGGCTACTGCTCGCAGTGCGCCGATCAGGGCGTAGTTTGAGTTTGATGCTCACCCGTATCA <del>AAAAACACCA</del>       | 62          | Mito   |
|                  | 6       | 0.03  | GTTTGGGCTACTGCTCGCAGTGCGCCGATCAGGGCGTAGTTTGAGTTTGATGCTCACCCGTATCA <del>AAAAACACCA</del>       | 62          | Mito   |
| nocaR-6          | 1       | 0.12  | GTTCACTTTAGCTACCCCAAGTGTATGGGCCCGGAGCGAGGAGAGTAGCACTTGTG <del>AACCCA</del>                    | 67          | Mito   |
|                  | 2       | 0.08  | GTTCACTTTAGCTACCCCAAGTGTATGGGCCCGGAGCGAGGAGAGTAGCACTTGTG <del>AACCCA</del>                    | 67          | Mito   |
| nocaR-7          |         | 0.14  | TCTGTGACTAGTATGTTGAGTCTCTGAAGTAGGAGAGTGATATTTGATCAGGAGAAGCTGGTTACTAGCACAG <del>ACCCA</del>    | 78          | Mito   |
| nocaR-8          |         | 0.12  | AGCTTAGCCTAGCCACACCCCCACGGGAAACAGCAGTGATTAACCTTTAGCAATAAACGAAAGTTTAACTAAGCT <del>CCCA</del>   | 79          | Mito   |
| nocaR-9          |         | 0.05  | TAGGAGCTGTATTTGCCATCAGGAGGCTTCACTGATTTCCCTATTCTCAGGCTACACCCT <del>ACCCA</del>                 | 72          | Mito   |
| nocaR-10         |         | 0.03  | CTCTTACGGGAAAGCAGATTTGGGTACCCCAAGTATTTGACTCAACCCATCAACA <del>GAACCA</del>                     | 62          | Mito   |
| nocaR-11         |         | 0.03  | GGGATAACAGCGCAATCCTATTCTAGAGTCCATATCAACAATAGGGTTTACGACCTCGATGTTGGATCAGGACATCC <del>ACCA</del> | 82          | Mito   |

**Table S2. Sequences of probes for northern blot**

| Probe                        | Sequence (5'–3')            |
|------------------------------|-----------------------------|
| ccaR-2 (probe #1)            | GCTAGTAACCACGTTCTCCTGAT     |
| ccaR-2 (probe #2)            | AGGACTCAACATACTAGTCAC       |
| nccaR-1 (probe #1)           | GAATGTCTGCACAGCCGCTTT       |
| nccaR-1 (probe #2)           | GCTTTCCACACAGACATCATAACAAA  |
| nccaR-2 (probe #1)           | GTTCAATATTACAGGCGAAC        |
| nccaR-2 (probe #2)           | GTGTGTTAATTAATTAATGCTTGTAGG |
| Cyto tRNA <sup>Lys</sup> CUU | GTCTCATGCTCTACCGACT         |
| Mito tRNA <sup>Val</sup> UAC | GTGTTAAGCTACACTCTG          |
| miR-16                       | GCCAATATTTACGTGCTGCTA       |
| U2 snRNA                     | CCAACTCCTAGTTCCAAAAATCC     |
| U1 snRNA                     | GTGATCATGGTATCTCCCCTGCCAG   |
| 5S rRNA                      | GTTCAGGGTGGTATGGCCGT        |

**Table S3. Sequences of primers for standard RT-qPCR**

| Target | Primer  | Sequence (5'–3')         |
|--------|---------|--------------------------|
| TNRT1  | Forward | GATTCTAGGGAACCTGATGC     |
|        | Reverse | GATGTCATGGCCAATTACAG     |
| RPLP0  | Forward | CTATCATCAACGGGTACAAACGAG |
|        | Reverse | CAGATGGATCAGCCAAGAAGG    |
| GAPDH  | Forward | GTCTTCACCACCATGGAGAAGG   |
|        | Reverse | ATGATCTTGAGGCTGTTGTCAT   |
